# Supplementary material for: Glycerophosphodiester phosphodiesterase 1 (GDE1) acts as a potential tumor suppressor and is a novel therapeutic target for non-mucin-producing colon adenocarcinoma
Source: PeerJ journal article supplement (doi:10.7717/peerj.8421), 2020-02-11

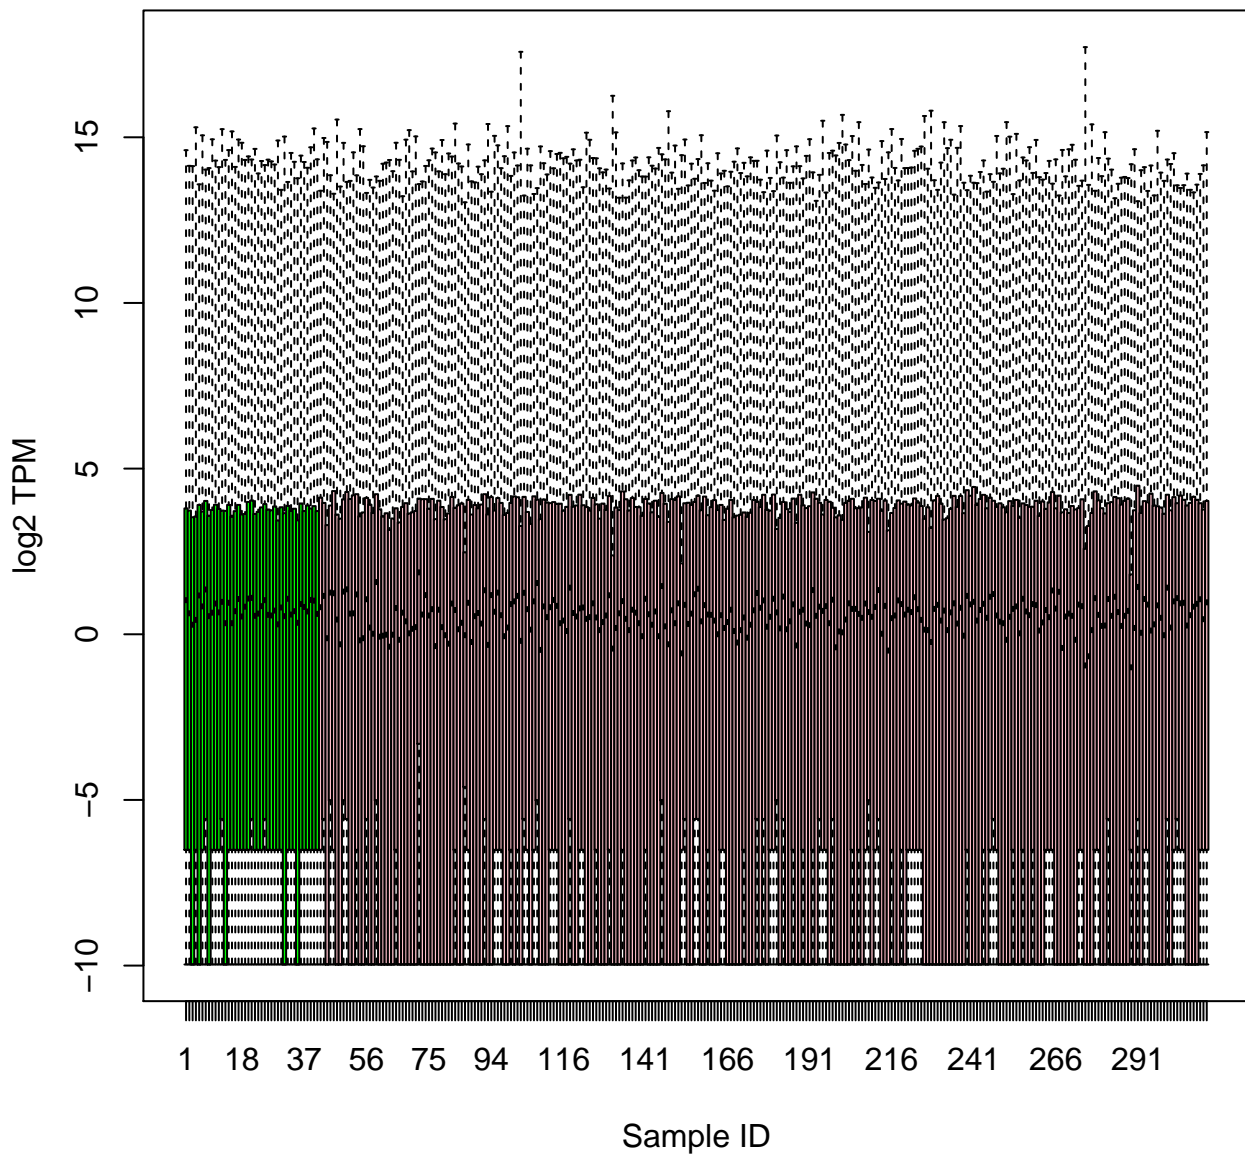

Supplement: Supplementary_Figure_S1.pdf [file Supplementary_Figure_S1.pdf]
